# Supplementary material for: Molybdenum sulfide clusters immobilized on defective graphene: a stable catalyst for the hydrogen evolution reaction
Source: Royal Society of Chemistry journal article supplement (doi:10.1039/c7ta09828f), 2018-01-01
Supplement: c7ta09828f1.pdf [file c7ta09828f1.pdf]

## Molybdenum Sulfide Clusters Immobilized on Defective Graphene:

### A Stable Catalyst for Hydrogen Evolution Reaction

Yixin Ouyang<sup>1</sup>, Qiang Li<sup>1</sup>, Li Shi<sup>1</sup>, Chongyi Ling<sup>1</sup>, and Jinlan Wang<sup>\*1,2</sup>

<sup>1</sup>School of Physics, Southeast University, Nanjing 211189, China

<sup>2</sup>Synergetic Innovation Center for Quantum Effects and Applications (SICQEA),  
Hunan Normal University, Changsha 410081, China

### Supporting Information

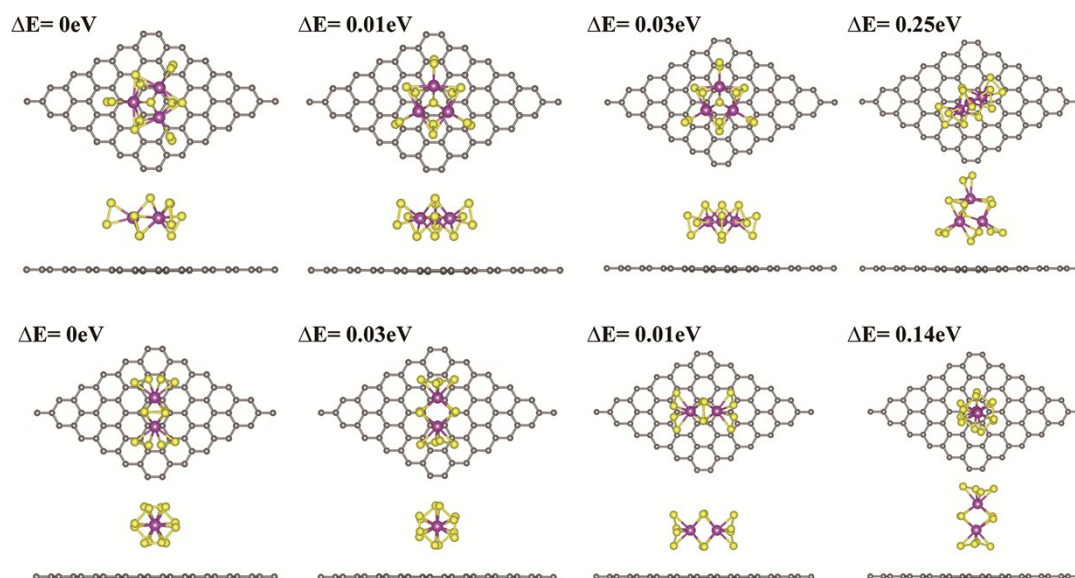

**Fig. S1** Relaxed adsorption structures with energy difference for different configurations of the Mo<sub>3</sub> and Mo<sub>2</sub> on defect-free graphene. The total energy of the lowest energy configuration is used as the reference.

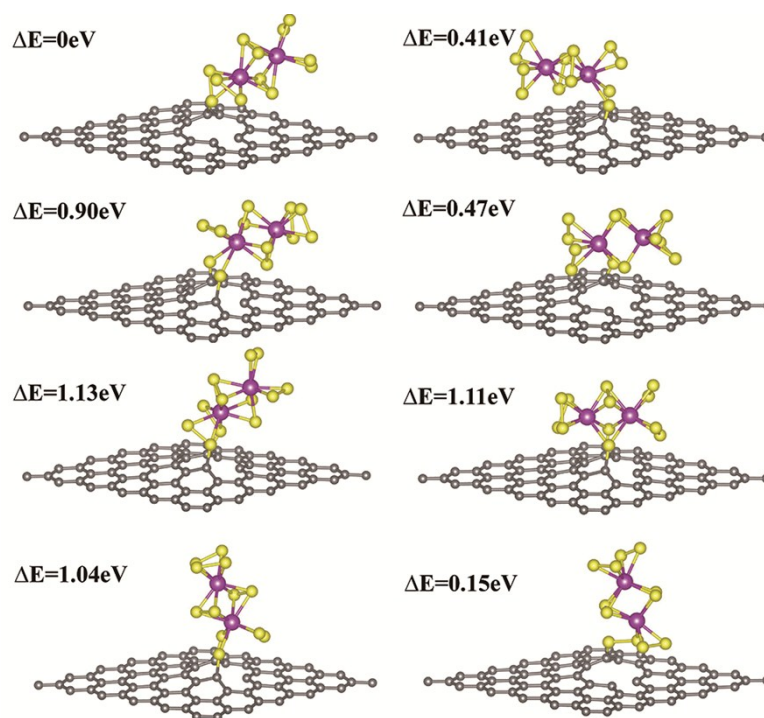

**Fig. S2** Relaxed adsorption structures with energy difference for different configurations of the Mo<sub>2</sub> on mono-vacancy graphene. The total energy of the lowest energy configuration is used as the reference.

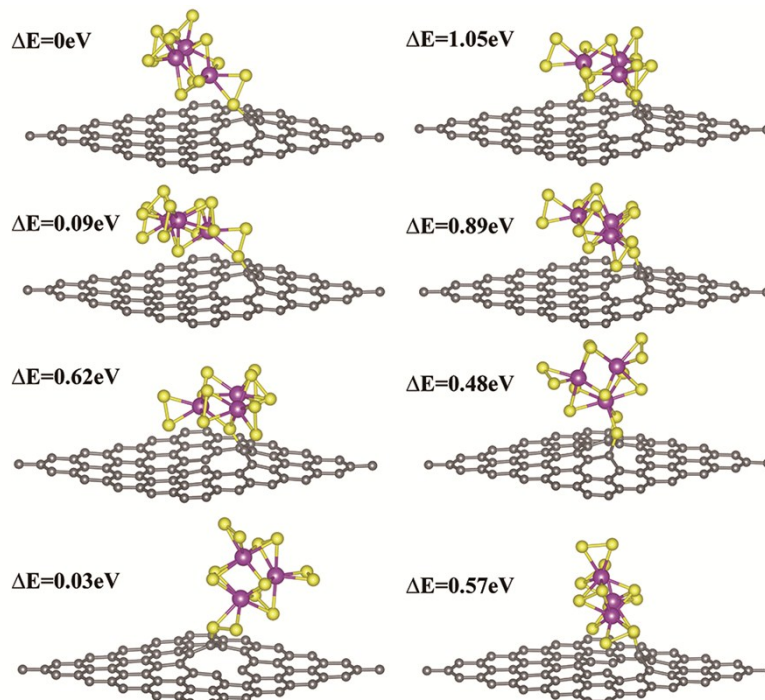

**Fig. S3** Relaxed adsorption structures with energy difference for different configurations of the Mo<sub>3</sub> on mono-vacancy graphene. The total energy of the lowest energy configuration is used as the reference.

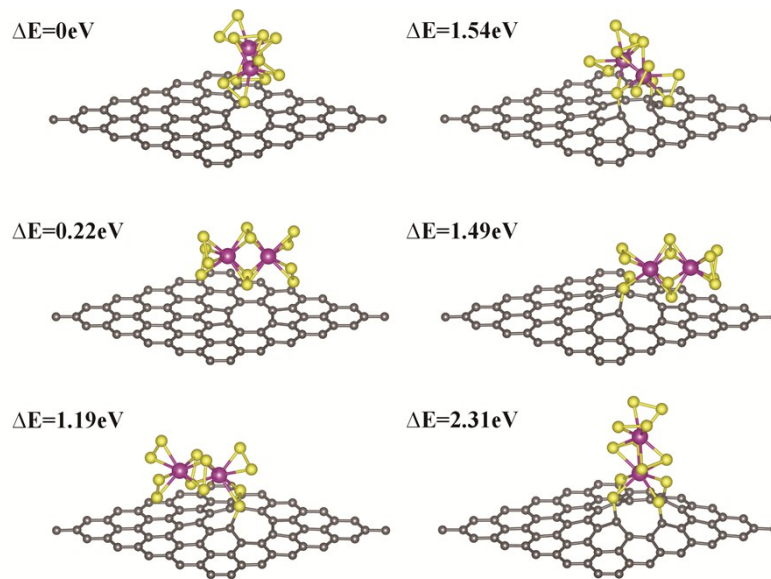

**Fig. S4** Relaxed adsorption structures with energy difference for different configurations of the Mo<sub>2</sub> on di-vacancy graphene. The total energy of the lowest energy configuration is used as the reference. The di-vacancy tends to form two pentagons and one octagon [V<sub>2</sub>(5-8-5) defect] rather than forming S-C bonds with Mo<sub>2</sub>.

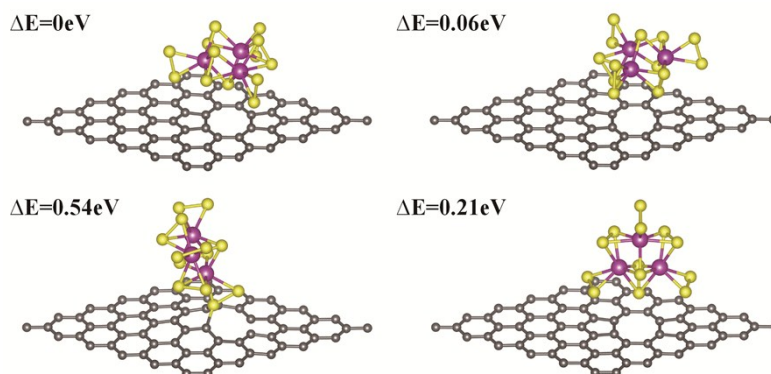

**Fig. S5** Relaxed adsorption structures with energy difference for different configurations of the Mo<sub>3</sub> on di-vacancy graphene. The total energy of the lowest energy configuration is used as the reference. The di-vacancy tends to form two pentagons and one octagon [V<sub>2</sub>(5-8-5) defect] rather than forming S-C bonds with Mo<sub>3</sub>.

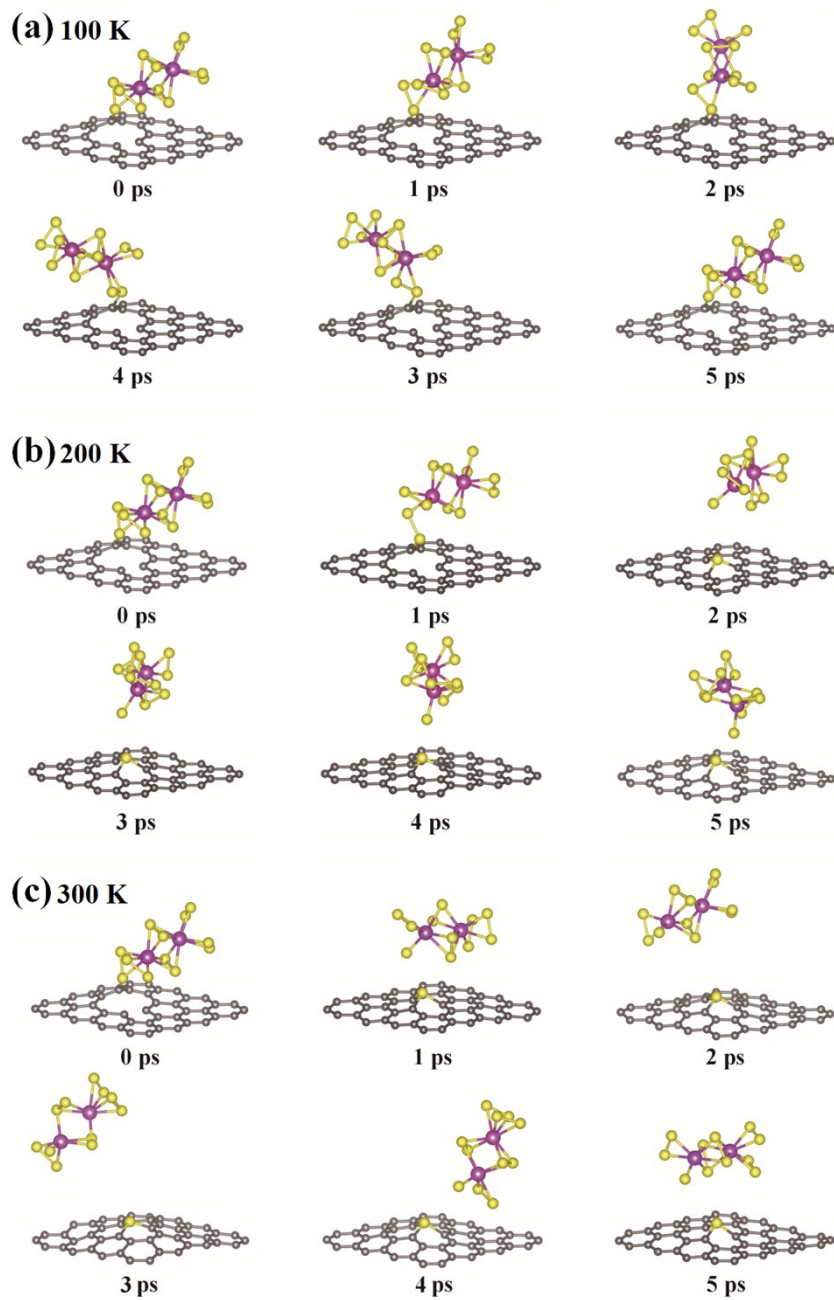

**Fig. S6** Ab initio molecular dynamics simulations of structure evolution of the most stable chemisorption configurations of Mo<sub>2</sub>@graphene at (a)100K, (b)200K and (c)300K in 5 picoseconds.

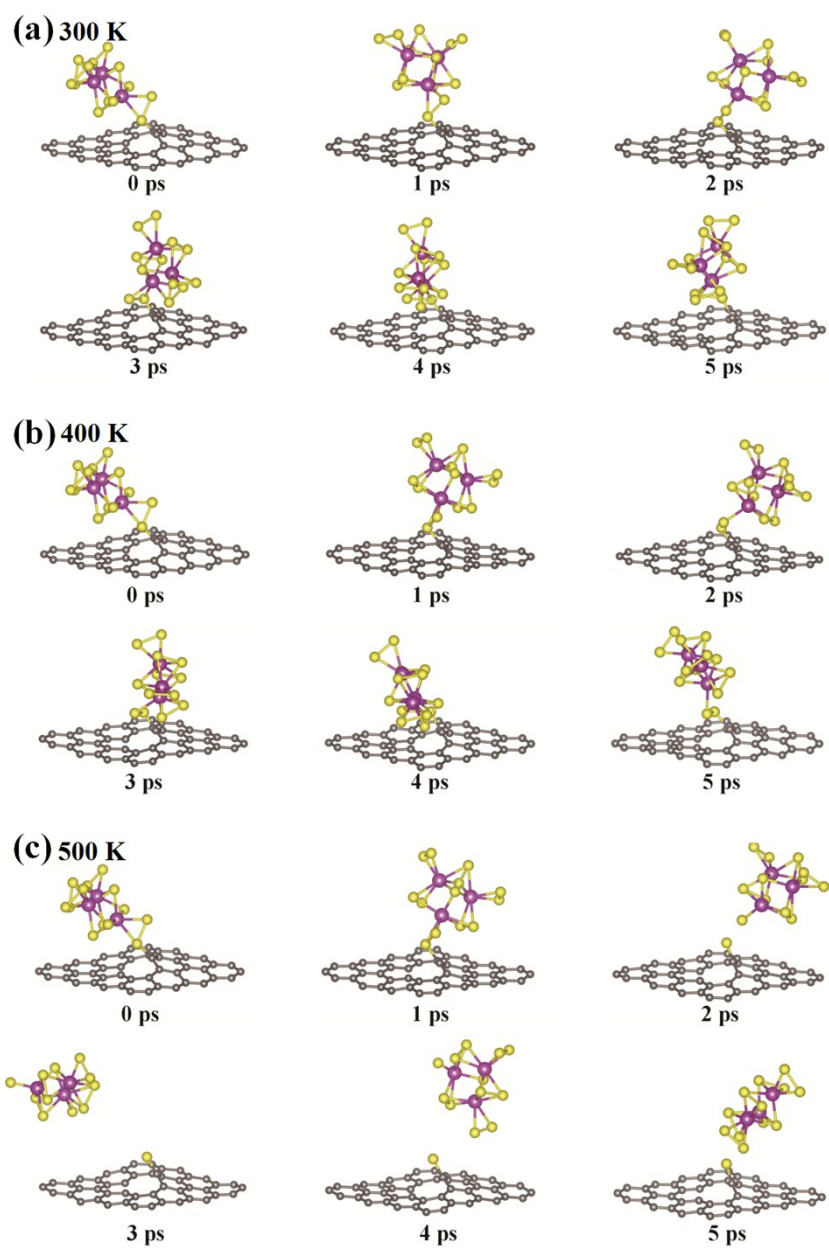

**Fig. S7** Ab initio molecular dynamics simulations of structure evolution of the most stable chemisorption configurations of Mo<sub>3</sub>@graphene at (a)100K, (b)200K and (c)300K in 5 picoseconds.

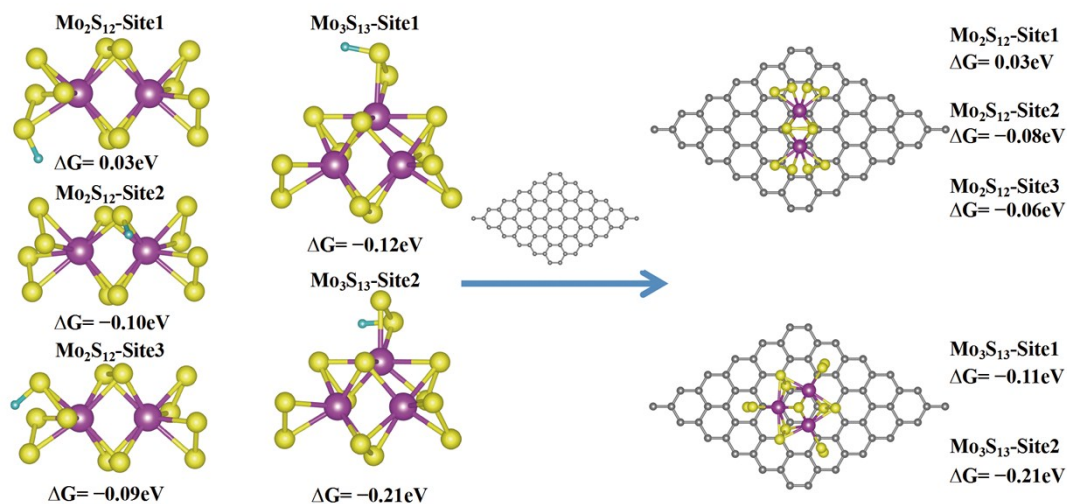

**Fig. S8** Favorable H adsorption configurations on Mo2 and Mo3 and  $\Delta G$  of Mo2 and Mo3 on graphene support.

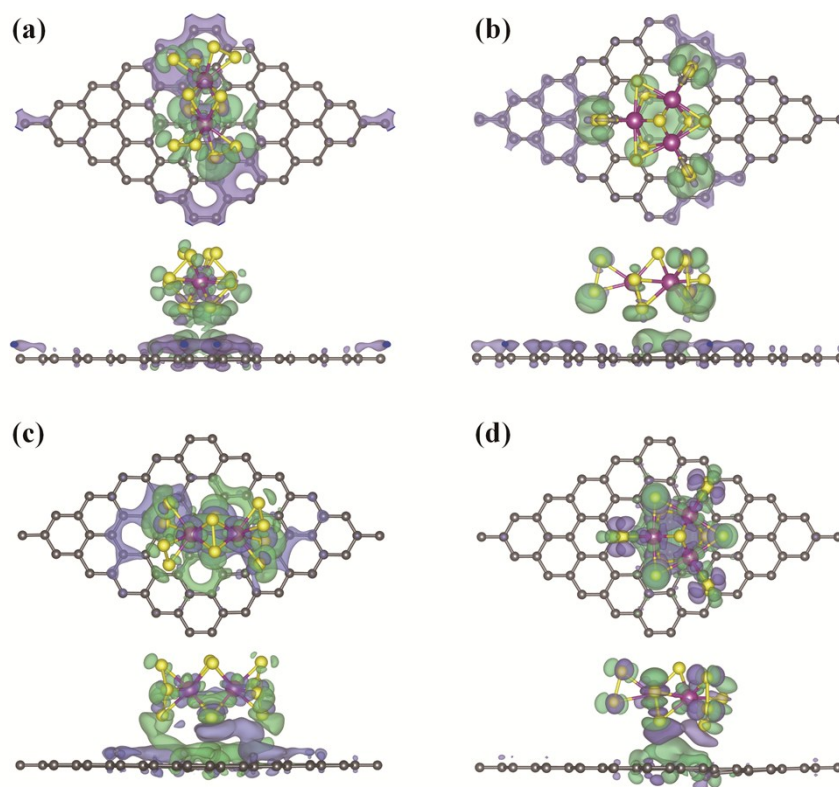

**Fig. S9** Charge density difference of (a) Mo2 and (b) Mo3 on defect-free graphene, (c) Mo2 and (d) Mo3 on graphene with mono-vacancy. Depletion and accumulation spaces are revealed in green and blue, respectively.

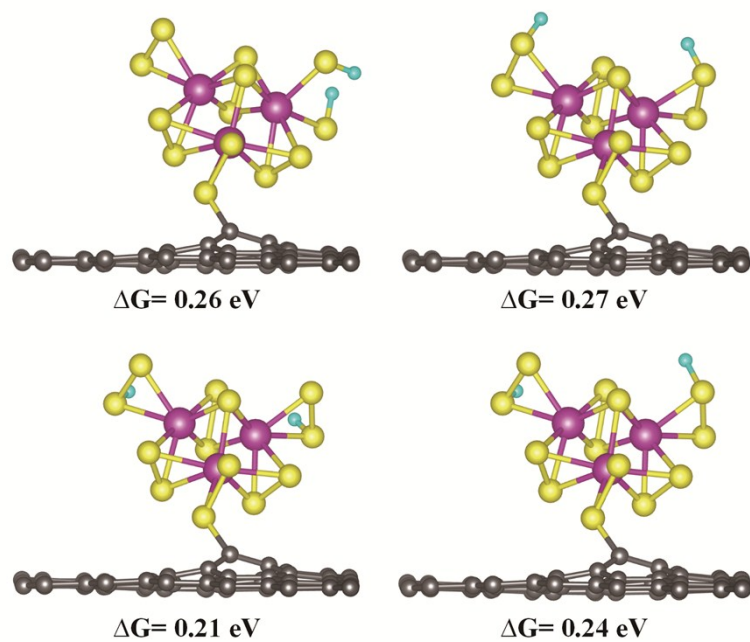

**Fig. S10** Four most favorable 2H adsorption configurations on Mo<sub>3</sub>@Graphene. Their associated  $\Delta G$  values are listed below each structure.
